# Supplementary material
Source: PubMed Central journal article supplement (PMC11376863)
Supplement: PBI-21-606-s002.pdf [file PBI-21-606-s002.pdf]

**Table S1** Summary of 13 representative soybean accessions for deep resequencing

| Accession name  | Type              | Origin                  | Resequencing depth (×) <sup>a</sup> | Coverage        |
|-----------------|-------------------|-------------------------|-------------------------------------|-----------------|
| Sui Nong No.14  | Improved cultivar | Heilongjiang, China     | 20.0                                | 0.97            |
| Enrei           | Improved cultivar | Japan                   | 20.8                                | 0.96            |
| Hui Bu Zhi      | Landrace          | Shanxi, China           | 15.3                                | 0.95            |
| Jin Dou No.23   | Improved cultivar | Shanxi, China           | 14.0                                | 0.96            |
| 1508-101        | Improved cultivar | China                   | 23.8                                | 0.97            |
| 1508-102        | Improved cultivar | China                   | 23.5                                | 0.96            |
| PI 518664       | Improved cultivar | Virginia, United States | 22.4                                | 0.97            |
| PI 483463       | <i>G. soja</i>    | Shanxi, China           | 21.5                                | 0.95            |
| Dong Nong No.50 | Improved cultivar | Heilongjiang, China     | 16.8                                | 0.96            |
| PI 548382       | Landrace          | Liaoning, China         | 29.0                                | 0.97            |
| Williams 82     | Improved cultivar | United States           | NA <sup>b</sup>                     | NA <sup>b</sup> |
| PI 437654       | Landrace          | China                   | 14.7                                | 0.96            |
| PI 603336       | Landrace          | Heilongjiang, China     | 24.5                                | 0.97            |

<sup>a</sup>Sequence depth was calculated based on the size of Williams 82 reference genome (Wm82.a2.v1).

<sup>b</sup>Not available

**Table S2** Eight soybean RIL populations constructed in our study

| No. | Population                   | Generation     | Population type | Female parent   | Male parent   | Number of lines |
|-----|------------------------------|----------------|-----------------|-----------------|---------------|-----------------|
| 1   | Sui Nong No.14 × Enrei       | F <sub>9</sub> | RIL             | Sui Nong No.14  | Enrei         | 138             |
| 2   | Hui Bu Zhi × Jin Dou No.23   | F <sub>9</sub> | RIL             | Hui Bu Zhi      | Jin Dou No.23 | 268             |
| 3   | 1508-101 × 1508-102          | F <sub>9</sub> | RIL             | 1508-101        | 1508-102      | 88              |
| 4   | PI 518664 × PI 483463        | F <sub>9</sub> | RIL             | PI 518664       | PI 483463     | 144             |
| 5   | Dong NongNo.50 × Williams 82 | F <sub>9</sub> | RIL             | Dong Nong No.50 | Williams 82   | 296             |
| 6   | PI 548382 × Williams 82      | F <sub>9</sub> | RIL             | PI 548382       | Williams 82   | 106             |
| 7   | PI 437654 × Williams 82      | F <sub>9</sub> | RIL             | PI 437654       | Williams 82   | 89              |
| 8   | PI 603336 × Williams 82      | F <sub>9</sub> | RIL             | PI 603336       | Williams 82   | 114             |

**Table S4** Summary of genetic maps for eight soybean RIL populations

| Populations                   | Number of SNPs | Number of bin markers | Number of recombination events | Average recombination events per RIL | Linkage distance (cM) | Distance between adjacent bins (cM) | Recombination rate (cM/Mb) |
|-------------------------------|----------------|-----------------------|--------------------------------|--------------------------------------|-----------------------|-------------------------------------|----------------------------|
| Sui Nong No.14 × Enrei        | 99023          | 3847                  | 7259.5                         | 52.6                                 | 2554.8                | 0.7                                 | 2.7                        |
| Hui Bu Zhi × Jin Dou No.23    | 142937         | 4742                  | 13157.5                        | 49.1                                 | 2430.2                | 0.5                                 | 2.6                        |
| 1508-101 × 1508-102           | 165468         | 3085                  | 5156.0                         | 58.6                                 | 2840.5                | 0.9                                 | 3.0                        |
| PI 518664 × PI 483463         | 198746         | 5472                  | 7894.0                         | 54.8                                 | 2355.5                | 0.4                                 | 2.5                        |
| Dong Nong No.50 × Williams 82 | 110424         | 5700                  | 15150.5                        | 51.2                                 | 2445.4                | 0.4                                 | 2.6                        |
| PI 548382 × Williams 82       | 119027         | 3119                  | 5764.5                         | 54.4                                 | 2568.9                | 0.8                                 | 2.7                        |
| PI 437654 × Williams 82       | 160193         | 2625                  | 4311.0                         | 48.4                                 | 2212.6                | 0.8                                 | 2.3                        |
| PI 603336 × Williams 82       | 120102         | 2926                  | 6219.5                         | 54.6                                 | 2550.4                | 0.9                                 | 2.7                        |
| Average                       | 139490         | 3940                  | 8114.1                         | 53.0                                 | 2494.8                | 0.7                                 | 2.6                        |

**Table S5** Summary for non-crossover (NCO) events detected in soybean RIL populations

| Population                   | Total NCO events | NCO per RIL | NCO length (bp) | Supported SNPs |
|------------------------------|------------------|-------------|-----------------|----------------|
| Sui Nong No.14 × Enrei       | 3132             | 23          | 28274           | 4              |
| Hui Bu Zhi × Jin Dou No.23   | 5673             | 21          | 31472           | 4              |
| 1508-101 × 1508-102          | 2321             | 26          | 28327           | 5              |
| PI 518664 × PI 483463        | 4091             | 28          | 14157           | 4              |
| Dong NongNo.50 × Williams 82 | 7564             | 26          | 17613           | 4              |
| PI 548382 × Williams 82      | 2508             | 24          | 26445           | 5              |
| PI 437654 × Williams 82      | 2702             | 30          | 21845           | 4              |
| PI 603336 × Williams 82      | 2622             | 23          | 21128           | 4              |

**Table S6** Recombination hotspots identified in 8 soybean RIL populations

| Chr.  | Start (Mb) | End (Mb) | Numbers of populations | Populations                                                                                                                                           |
|-------|------------|----------|------------------------|-------------------------------------------------------------------------------------------------------------------------------------------------------|
| Chr01 | 1          | 2        | 1                      | Sui Nong No.14 × Enrei                                                                                                                                |
| Chr01 | 2          | 3        | 4                      | Sui Nong No.14 × Enrei 1508-101 × 1508-102 PI 437654 × Williams 82 Hui Bu Zhi × Jin Dou No.23                                                         |
| Chr01 | 3          | 4        | 6                      | Sui Nong No.14 × Enrei 1508-101 × 1508-102 PI 603336 × Williams 82 PI 437654 × Williams 82 Hui Bu Zhi × Jin Dou No.23 PI 518664 × PI 483463           |
| Chr01 | 4          | 5        | 5                      | 1508-101 × 1508-102 PI 603336 × Williams 82 PI 437654 × Williams 82 Hui Bu Zhi × Jin Dou No.23 PI 518664 × PI 483463                                  |
| Chr01 | 49         | 50       | 2                      | Hui Bu Zhi × Jin Dou No.23 PI 548382 × Williams 82                                                                                                    |
| Chr01 | 50         | 52       | 6                      | Sui Nong No.14 × Enrei Dong Nong No.50 × Williams 82 PI 603336 × Williams 82 Hui Bu Zhi × Jin Dou No.23 PI 518664 × PI 483463 PI 548382 × Williams 82 |
| Chr01 | 52         | 53       | 1                      | Sui Nong No.14 × Enrei                                                                                                                                |
| Chr02 | 14         | 16       | 6                      | Sui Nong No.14 × Enrei Dong Nong No.50 × Williams 82 1508-101 × 1508-102 PI 437654 × Williams 82 PI 518664 × PI 483463 PI 548382 × Williams 82        |
| Chr02 | 28         | 31       | 1                      | Hui Bu Zhi × Jin Dou No.23                                                                                                                            |
| Chr02 | 40         | 42       | 1                      | Dong Nong No.50 × Williams 82                                                                                                                         |
| Chr02 | 42         | 43       | 3                      | Dong Nong No.50 × Williams 82 1508-101 × 1508-102 PI 437654 × Williams 82                                                                             |
| Chr02 | 43         | 45       | 2                      | 1508-101 × 1508-102 PI 437654 × Williams 82                                                                                                           |
| Chr02 | 45         | 47       | 1                      | PI 437654 × Williams 82                                                                                                                               |
| Chr03 | 0          | 2        | 3                      | 1508-101 × 1508-102 PI 437654 × Williams 82 PI 518664 × PI 483463                                                                                     |
| Chr03 | 2          | 3        | 1                      | PI 437654 × Williams 82                                                                                                                               |
| Chr03 | 14         | 16       | 1                      | Hui Bu Zhi × Jin Dou No.23                                                                                                                            |
| Chr03 | 33         | 34       | 2                      | 1508-101 × 1508-102 PI 437654 × Williams 82                                                                                                           |
| Chr03 | 34         | 35       | 3                      | 1508-101 × 1508-102 PI 437654 × Williams 82 PI 518664 × PI 483463                                                                                     |
| Chr03 | 35         | 36       | 1                      | PI 518664 × PI 483463                                                                                                                                 |
| Chr03 | 40         | 42       | 1                      | PI 603336 × Williams 82                                                                                                                               |

**Table S6.** Continued

---

|       |    |      |   |                                                                                                                      |
|-------|----|------|---|----------------------------------------------------------------------------------------------------------------------|
| Chr04 | 3  | 4    | 1 | PI 603336 × Williams 82                                                                                              |
| Chr04 | 4  | 5    | 3 | PI 603336 × Williams 82 PI 437654 × Williams 82 Hui Bu Zhi × Jin Dou No.23                                           |
| Chr04 | 5  | 6    | 4 | 1508-101 × 1508-102 PI 437654 × Williams 82 Hui Bu Zhi × Jin Dou No.23 PI 548382 × Williams 82                       |
| Chr04 | 6  | 7    | 3 | 1508-101 × 1508-102 PI 437654 × Williams 82 PI 548382 × Williams 82                                                  |
| Chr04 | 7  | 8    | 1 | 1508-101 × 1508-102                                                                                                  |
| Chr04 | 47 | 49   | 4 | Sui Nong No.14 × Enrei PI 437654 × Williams 82 Hui Bu Zhi × Jin Dou No.23 PI 548382 × Williams 82                    |
| Chr04 | 49 | 50   | 2 | Hui Bu Zhi × Jin Dou No.23 PI 548382 × Williams 82                                                                   |
| Chr05 | 1  | 2    | 4 | 1508-101 × 1508-102 Hui Bu Zhi × Jin Dou No.23 PI 518664 × PI 483463 PI 548382 × Williams 82                         |
| Chr05 | 2  | 3    | 5 | 1508-101 × 1508-102 PI 437654 × Williams 82 Hui Bu Zhi × Jin Dou No.23 PI 518664 × PI 483463 PI 548382 × Williams 82 |
| Chr05 | 3  | 4    | 5 | 1508-101 × 1508-102 PI 603336 × Williams 82 PI 437654 × Williams 82 PI 518664 × PI 483463 PI 548382 × Williams 82    |
| Chr05 | 4  | 5    | 4 | PI 603336 × Williams 82 PI 437654 × Williams 82 PI 518664 × PI 483463 PI 548382 × Williams 82                        |
| Chr05 | 5  | 6    | 2 | PI 603336 × Williams 82 PI 437654 × Williams 82                                                                      |
| Chr05 | 33 | 35   | 1 | PI 548382 × Williams 82                                                                                              |
| Chr05 | 38 | 41   | 1 | 1508-101 × 1508-102                                                                                                  |
| Chr06 | 2  | 4    | 2 | 1508-101 × 1508-102 PI 548382 × Williams 82                                                                          |
| Chr06 | 4  | 5    | 1 | PI 548382 × Williams 82                                                                                              |
| Chr06 | 11 | 13   | 1 | Dong Nong No.50 × Williams 82                                                                                        |
| Chr06 | 13 | 14   | 2 | Dong Nong No.50 × Williams 82 PI 518664 × PI 483463                                                                  |
| Chr06 | 14 | 16   | 1 | PI 518664 × PI 483463                                                                                                |
| Chr06 | 16 | 20   | 1 | PI 437654 × Williams 82                                                                                              |
| Chr06 | 48 | 49   | 2 | PI 603336 × Williams 82 Hui Bu Zhi × Jin Dou No.23                                                                   |
| Chr06 | 49 | 50   | 3 | 1508-101 × 1508-102 PI 603336 × Williams 82 Hui Bu Zhi × Jin Dou No.23                                               |
| Chr06 | 50 | 51.4 | 1 | 1508-101 × 1508-102                                                                                                  |
| Chr07 | 3  | 4    | 1 | Sui Nong No.14 × Enrei                                                                                               |
| Chr07 | 4  | 5    | 2 | Sui Nong No.14 × Enrei PI 603336 × Williams 82                                                                       |
| Chr07 | 5  | 6    | 1 | PI 603336 × Williams 82                                                                                              |

---

**Table S6.** Continued

---

|       |    |      |   |                                                                                                                                                                                                       |
|-------|----|------|---|-------------------------------------------------------------------------------------------------------------------------------------------------------------------------------------------------------|
| Chr07 | 35 | 37   | 1 | PI 603336 × Williams 82                                                                                                                                                                               |
| Chr07 | 37 | 39   | 2 | PI 603336 × Williams 82 PI 437654 × Williams 82                                                                                                                                                       |
| Chr07 | 42 | 44.6 | 1 | 1508-101 × 1508-102                                                                                                                                                                                   |
| Chr08 | 3  | 5    | 1 | Hui Bu Zhi × Jin Dou No.23                                                                                                                                                                            |
| Chr08 | 5  | 7    | 1 | PI 603336 × Williams 82                                                                                                                                                                               |
| Chr08 | 44 | 45   | 2 | PI 437654 × Williams 82 Hui Bu Zhi × Jin Dou No.23                                                                                                                                                    |
| Chr08 | 45 | 47   | 3 | PI 437654 × Williams 82 Hui Bu Zhi × Jin Dou No.23 PI 518664 × PI 483463                                                                                                                              |
| Chr08 | 47 | 47.8 | 2 | PI 603336 × Williams 82 PI 518664 × PI 483463                                                                                                                                                         |
| Chr09 | 0  | 1    | 1 | Dong Nong No.50 × Williams 82                                                                                                                                                                         |
| Chr09 | 1  | 2    | 2 | Sui Nong No.14 × Enrei Dong Nong No.50 × Williams 82                                                                                                                                                  |
| Chr09 | 2  | 4    | 3 | Sui Nong No.14 × Enrei Dong Nong No.50 × Williams 82 PI 548382 × Williams 82                                                                                                                          |
| Chr09 | 4  | 5    | 1 | Dong Nong No.50 × Williams 82                                                                                                                                                                         |
| Chr09 | 11 | 14   | 1 | PI 548382 × Williams 82                                                                                                                                                                               |
| Chr10 | 0  | 2    | 1 | PI 437654 × Williams 82                                                                                                                                                                               |
| Chr10 | 2  | 3    | 2 | PI 518664 × PI 483463 PI 548382 × Williams 82                                                                                                                                                         |
| Chr10 | 3  | 5    | 5 | Sui Nong No.14 × Enrei PI 603336 × Williams 82 PI 437654 × Williams 82 PI 518664 × PI 483463 PI 548382 × Williams 82                                                                                  |
| Chr10 | 5  | 6    | 1 | PI 548382 × Williams 82                                                                                                                                                                               |
| Chr10 | 38 | 39   | 1 | Sui Nong No.14 × Enrei                                                                                                                                                                                |
| Chr10 | 39 | 40   | 2 | Sui Nong No.14 × Enrei PI 437654 × Williams 82                                                                                                                                                        |
| Chr10 | 40 | 41   | 1 | PI 437654 × Williams 82                                                                                                                                                                               |
| Chr10 | 44 | 46   | 1 | PI 437654 × Williams 82                                                                                                                                                                               |
| Chr11 | 8  | 9    | 3 | Dong Nong No.50 × Williams 82 PI 437654 × Williams 82 Hui Bu Zhi × Jin Dou No.23                                                                                                                      |
| Chr11 | 9  | 10   | 5 | Dong Nong No.50 × Williams 82 PI 603336 × Williams 82 PI 437654 × Williams 82 Hui Bu Zhi × Jin Dou No.23 <br>PI 548382 × Williams 82                                                                  |
| Chr11 | 10 | 12   | 8 | Sui Nong No.14 × Enrei Dong Nong No.50 × Williams 82 1508-101 × 1508-102 PI 603336 × Williams 82 <br>PI 437654 × Williams 82 Hui Bu Zhi × Jin Dou No.23 PI 518664 × PI 483463 PI 548382 × Williams 82 |

---

**Table S6.** Continued

---

|       |    |      |   |                                                                                                                                     |
|-------|----|------|---|-------------------------------------------------------------------------------------------------------------------------------------|
| Chr11 | 12 | 13   | 1 | PI 518664 × PI 483463                                                                                                               |
| Chr11 | 24 | 26   | 2 | 1508-101 × 1508-102 PI 437654 × Williams 82                                                                                         |
| Chr11 | 26 | 27   | 3 | 1508-101 × 1508-102 PI 437654 × Williams 82 PI 548382 × Williams 82                                                                 |
| Chr11 | 27 | 28   | 2 | PI 437654 × Williams 82 PI 548382 × Williams 82                                                                                     |
| Chr11 | 30 | 31   | 1 | PI 437654 × Williams 82                                                                                                             |
| Chr11 | 31 | 32   | 3 | Sui Nong No.14 × Enrei PI 437654 × Williams 82 Hui Bu Zhi × Jin Dou No.23                                                           |
| Chr11 | 32 | 33   | 5 | Sui Nong No.14 × Enrei Dong Nong No.50 × Williams 82 PI 603336 × Williams 82 PI 437654 × Williams 82 <br>Hui Bu Zhi × Jin Dou No.23 |
| Chr11 | 33 | 34   | 4 | Sui Nong No.14 × Enrei Dong Nong No.50 × Williams 82 PI 603336 × Williams 82 PI 437654 × Williams 82                                |
| Chr11 | 34 | 34.8 | 3 | Sui Nong No.14 × Enrei PI 437654 × Williams 82 Hui Bu Zhi × Jin Dou No.23                                                           |
| Chr12 | 2  | 4    | 2 | PI 437654 × Williams 82 PI 548382 × Williams 82                                                                                     |
| Chr12 | 4  | 5    | 2 | Dong Nong No.50 × Williams 82 PI 437654 × Williams 82                                                                               |
| Chr12 | 5  | 6    | 1 | Dong Nong No.50 × Williams 82                                                                                                       |
| Chr12 | 6  | 8    | 1 | 1508-101 × 1508-102                                                                                                                 |
| Chr12 | 32 | 35   | 1 | Hui Bu Zhi × Jin Dou No.23                                                                                                          |
| Chr12 | 36 | 37   | 2 | PI 603336 × Williams 82 PI 437654 × Williams 82                                                                                     |
| Chr12 | 37 | 38   | 3 | PI 603336 × Williams 82 PI 437654 × Williams 82 PI 518664 × PI 483463                                                               |
| Chr12 | 38 | 39   | 1 | PI 518664 × PI 483463                                                                                                               |
| Chr13 | 20 | 21   | 1 | PI 603336 × Williams 82                                                                                                             |
| Chr13 | 21 | 22   | 3 | Dong Nong No.50 × Williams 82 PI 603336 × Williams 82 PI 437654 × Williams 82                                                       |
| Chr13 | 22 | 23   | 2 | Dong Nong No.50 × Williams 82 PI 437654 × Williams 82                                                                               |
| Chr13 | 23 | 24   | 1 | PI 437654 × Williams 82                                                                                                             |
| Chr13 | 25 | 28   | 1 | PI 603336 × Williams 82                                                                                                             |
| Chr13 | 35 | 37   | 1 | 1508-101 × 1508-102                                                                                                                 |
| Chr14 | 6  | 7    | 3 | PI 437654 × Williams 82 Hui Bu Zhi × Jin Dou No.23 PI 518664 × PI 483463                                                            |
| Chr14 | 7  | 8    | 4 | PI 437654 × Williams 82 Hui Bu Zhi × Jin Dou No.23 PI 518664 × PI 483463 PI 548382 × Williams 82                                    |

---



**Table S6.** Continued

---

|       |    |      |   |                                                                                                                                                             |
|-------|----|------|---|-------------------------------------------------------------------------------------------------------------------------------------------------------------|
| Chr14 | 8  | 9    | 3 | PI 437654 × Williams 82 Hui Bu Zhi × Jin Dou No.23 PI 548382 × Williams 82                                                                                  |
| Chr14 | 40 | 42   | 1 | PI 437654 × Williams 82                                                                                                                                     |
| Chr14 | 44 | 45   | 2 | PI 518664 × PI 483463 PI 548382 × Williams 82                                                                                                               |
| Chr14 | 45 | 46   | 3 | Hui Bu Zhi × Jin Dou No.23 PI 518664 × PI 483463 PI 548382 × Williams 82                                                                                    |
| Chr14 | 46 | 49.0 | 3 | 1508-101 × 1508-102 Hui Bu Zhi × Jin Dou No.23 PI 518664 × PI 483463                                                                                        |
| Chr15 | 3  | 5    | 1 | Dong Nong No.50 × Williams 82                                                                                                                               |
| Chr15 | 9  | 12   | 1 | PI 437654 × Williams 82                                                                                                                                     |
| Chr15 | 49 | 51.8 | 1 | PI 518664 × PI 483463                                                                                                                                       |
| Chr16 | 2  | 3    | 1 | Hui Bu Zhi × Jin Dou No.23                                                                                                                                  |
| Chr16 | 3  | 5    | 2 | Dong Nong No.50 × Williams 82 Hui Bu Zhi × Jin Dou No.23                                                                                                    |
| Chr16 | 5  | 6    | 2 | Dong Nong No.50 × Williams 82 PI 437654 × Williams 82                                                                                                       |
| Chr16 | 6  | 8    | 1 | PI 437654 × Williams 82                                                                                                                                     |
| Chr16 | 30 | 32   | 1 | PI 518664 × PI 483463                                                                                                                                       |
| Chr16 | 35 | 37.9 | 1 | Hui Bu Zhi × Jin Dou No.23                                                                                                                                  |
| Chr17 | 6  | 8    | 1 | 1508-101 × 1508-102                                                                                                                                         |
| Chr17 | 8  | 9    | 2 | Dong Nong No.50 × Williams 82 1508-101 × 1508-102                                                                                                           |
| Chr17 | 9  | 10   | 3 | Dong Nong No.50 × Williams 82 1508-101 × 1508-102 PI 437654 × Williams 82                                                                                   |
| Chr17 | 10 | 11   | 2 | PI 437654 × Williams 82 Hui Bu Zhi × Jin Dou No.23                                                                                                          |
| Chr17 | 11 | 12   | 1 | Hui Bu Zhi × Jin Dou No.23                                                                                                                                  |
| Chr17 | 37 | 38   | 1 | PI 437654 × Williams 82                                                                                                                                     |
| Chr17 | 38 | 40   | 6 | Sui Nong No.14 × Enrei Dong Nong No.50 × Williams 82 PI 603336 × Williams 82 PI 437654 × Williams 82 <br>Hui Bu Zhi × Jin Dou No.23 PI 548382 × Williams 82 |
| Chr17 | 40 | 41   | 5 | Sui Nong No.14 × Enrei Dong Nong No.50 × Williams 82 PI 603336 × Williams 82 PI 437654 × Williams 82 <br>PI 548382 × Williams 82                            |
| Chr17 | 41 | 41.6 | 4 | Sui Nong No.14 × Enrei Dong Nong No.50 × Williams 82 PI 603336 × Williams 82 PI 548382 × Williams 82                                                        |
| Chr18 | 3  | 5    | 2 | PI 603336 × Williams 82 PI 437654 × Williams 82                                                                                                             |

---

**Table S6.** Continued

---

|       |    |    |   |                                                                                                                                                                                                       |
|-------|----|----|---|-------------------------------------------------------------------------------------------------------------------------------------------------------------------------------------------------------|
| Chr18 | 5  | 6  | 1 | PI 603336 × Williams 82                                                                                                                                                                               |
| Chr18 | 54 | 56 | 1 | 1508-101 × 1508-102                                                                                                                                                                                   |
| Chr19 | 0  | 2  | 2 | 1508-101 × 1508-102 Hui Bu Zhi × Jin Dou No.23                                                                                                                                                        |
| Chr19 | 2  | 3  | 1 | 1508-101 × 1508-102                                                                                                                                                                                   |
| Chr19 | 39 | 40 | 1 | PI 518664 × PI 483463                                                                                                                                                                                 |
| Chr19 | 40 | 41 | 2 | PI 437654 × Williams 82 PI 518664 × PI 483463                                                                                                                                                         |
| Chr19 | 41 | 42 | 1 | PI 437654 × Williams 82                                                                                                                                                                               |
| Chr19 | 42 | 43 | 2 | PI 437654 × Williams 82 Hui Bu Zhi × Jin Dou No.23                                                                                                                                                    |
| Chr19 | 43 | 46 | 2 | Dong Nong No.50 × Williams 82 Hui Bu Zhi × Jin Dou No.23                                                                                                                                              |
| Chr20 | 0  | 2  | 8 | Sui Nong No.14 × Enrei Dong Nong No.50 × Williams 82 1508-101 × 1508-102 PI 603336 × Williams 82 <br>PI 437654 × Williams 82 Hui Bu Zhi × Jin Dou No.23 PI 518664 × PI 483463 PI 548382 × Williams 82 |
| Chr20 | 2  | 3  | 1 | Sui Nong No.14 × Enrei                                                                                                                                                                                |
| Chr20 | 34 | 36 | 1 | PI 437654 × Williams 82                                                                                                                                                                               |
| Chr20 | 36 | 40 | 1 | Dong Nong No.50 × Williams 82                                                                                                                                                                         |

---

**Table S7** QTL mapping for recombination hotspot usage

| QTLs           | Trait         | Chr.  | Peak position (cM) | LOD | R <sup>2</sup> (%) <sup>a</sup> | Additive <sup>b</sup> | Range (cM) <sup>c</sup> | Populations                |
|----------------|---------------|-------|--------------------|-----|---------------------------------|-----------------------|-------------------------|----------------------------|
| <i>qHU2</i>    | Hotspot usage | Chr02 | 118                | 2.8 | 5.7                             | -0.01                 | 115.5-120.5             | PI 548382 × Williams 82    |
| <i>qHU4-1</i>  | Hotspot usage | Chr04 | 59                 | 2.9 | 5.9                             | -0.01                 | 56.5-60.5               | PI 548382 × Williams 82    |
| <i>qHU4-2</i>  | Hotspot usage | Chr04 | 70                 | 2.7 | 5.7                             | -0.01                 | 65.5-74.5               | PI 548382 × Williams 82    |
| <i>qHU8</i>    | Hotspot usage | Chr08 | 138                | 2.5 | 8.3                             | -0.01                 | 131.5-140.5             | PI 518664 × PI 483463      |
| <i>qHU10-1</i> | Hotspot usage | Chr10 | 9                  | 3.1 | 10.3                            | 0.03                  | 5.5-14.5                | PI 437654 × Williams 82    |
| <i>qHU10-2</i> | Hotspot usage | Chr10 | 110                | 2.8 | 5.8                             | -0.01                 | 107.5-112.5             | PI 548382 × Williams 82    |
|                | Hotspot usage | Chr10 | 119                | 2.8 | 15.5                            | -0.02                 | 116.5-119.5             | 1508-101 × 1508-102        |
| <i>qHU13-1</i> | Hotspot usage | Chr13 | 20                 | 2.7 | 15.6                            | -0.02                 | 18.5-25.5               | 1508-101 × 1508-102        |
| <i>qHU13-2</i> | Hotspot usage | Chr13 | 78                 | 2.7 | 9.1                             | -0.03                 | 75.5-78.5               | PI 437654 × Williams 82    |
| <i>qHU14</i>   | Hotspot usage | Chr14 | 55                 | 3.5 | 5.8                             | -0.01                 | 52.5-56.5               | Hui Bu Zhi × Jin Dou No.23 |
| <i>qHU18</i>   | Hotspot usage | Chr18 | 1                  | 2.6 | 10.6                            | -0.02                 | 0-1.5                   | PI 603336 × Williams 82    |
| <i>qHU19</i>   | Hotspot usage | Chr19 | 75                 | 3.2 | 9.8                             | -0.02                 | 74.5-76.5               | PI 518664 × PI 483463      |

<sup>a</sup>Percentage of phenotypic variation explained by the identified QTL

<sup>b</sup>Additive effect of QTL from female parent

<sup>c</sup>Confidence interval calculated by one-LOD drop.

**Table S8** QTL mapping for the total number of recombination events for each RIL in soybean RIL populations

| QTLs           | Trait               | Chr.  | Peak position (cM) | LOD | R <sup>2</sup> (%) <sup>a</sup> | Additive effect <sup>b</sup> | Range (cM) <sup>c</sup> | Populations               |
|----------------|---------------------|-------|--------------------|-----|---------------------------------|------------------------------|-------------------------|---------------------------|
| <i>qRE1</i>    | Recombination event | Chr01 | 100                | 3.1 | 8.1                             | -2.6                         | 98.5-100.5              | PI 603336 × Williams 82   |
| <i>qRE3.1</i>  | Recombination event | Chr03 | 13                 | 3.3 | 8.2                             | 2.4                          | 10.5-15.5               | Sui Nong No.14 × Enrei    |
| <i>qRE3.2</i>  | Recombination event | Chr03 | 44                 | 3.3 | 8.7                             | 2.5                          | 41.5-44.5               | Sui Nong No.14 × Enrei    |
| <i>qRE5</i>    | Recombination event | Chr05 | 24                 | 3.4 | 5.7                             | 1.7                          | 21.5-24.5               | Hui Bu Zhi × Jin Dou No.2 |
| <i>qRE7</i>    | Recombination event | Chr07 | 12                 | 2.8 | 7.0                             | -2.2                         | 10.5-15.5               | Sui Nong No.14 × Enrei    |
| <i>qRE10</i>   | Recombination event | Chr10 | 124                | 3.0 | 10.4                            | -5.3                         | 121.5-125.5             | 1508-101 × 1508-102       |
| <i>qRE11.1</i> | Recombination event | Chr11 | 13                 | 2.9 | 10.2                            | 5.3                          | 10.5-18.5               | 1508-101 × 1508-102       |
| <i>qRE11.2</i> | Recombination event | Chr11 | 84                 | 2.6 | 7.0                             | 2.4                          | 80.5-97.5               | PI 603336 × Williams 82   |
| <i>qRE11.3</i> | Recombination event | Chr11 | 126                | 3.0 | 8.2                             | 2.6                          | 119.5-130.5             | PI 603336 × Williams 82   |
| <i>qRE12</i>   | Recombination event | Chr12 | 11                 | 2.7 | 8.2                             | -3.0                         | 10.5-13.5               | PI 518664 × PI 483463     |
| <i>qRE13</i>   | Recombination event | Chr13 | 111                | 2.7 | 14.8                            | 2.4                          | 110.5-112.5             | PI 437654 × Williams 82   |
| <i>qRE18.1</i> | Recombination event | Chr18 | 67                 | 3.6 | 12.9                            | -5.9                         | 65.5-67.5               | 1508-101 × 1508-102       |
| <i>qRE18.2</i> | Recombination event | Chr18 | 71                 | 3.8 | 13.1                            | -6.0                         | 69.5-72.5               | 1508-101 × 1508-102       |

<sup>a</sup>Percentage of phenotypic variation explained by the identified QTL.

<sup>b</sup>Additive effect of QTL from female parent.

<sup>c</sup>Confidence interval calculated by one-LOD drop.

**Table S9** Sequencing information in this study

| Soybean accession | Replicates | Tissues          | Library type         | Raw reads pairs | Read length | Raw bases      | Depth ( $\times$ ) <sup>a</sup> | Trimmed bases  |
|-------------------|------------|------------------|----------------------|-----------------|-------------|----------------|---------------------------------|----------------|
| Williams 82       | replicate1 | 2-4mm flower bud | ATAC-seq             | 21,654,294      | 150         | 6,496,288,200  | 6.6                             | 1,263,078,361  |
| Williams 82       | replicate2 | 2-4mm flower bud | ATAC-seq             | 31,536,075      | 150         | 9,460,822,500  | 9.7                             | 1,785,633,953  |
| Williams 82       | replicate1 | 2-4mm flower bud | CUT&Tag for H3K4me3  | 19,776,880      | 150         | 5,933,064,000  | 6.1                             | 1,267,286,083  |
| Williams 82       | replicate2 | 2-4mm flower bud | CUT&Tag for H3K4me3  | 14,543,956      | 150         | 4,363,186,800  | 4.5                             | 884,925,991    |
| Williams 82       | replicate1 | 2-4mm flower bud | CUT&Tag for H3K9me3  | 24,244,421      | 150         | 7,273,326,300  | 7.4                             | 2,541,680,042  |
| Williams 82       | replicate2 | 2-4mm flower bud | CUT&Tag for H3K9me3  | 23,931,132      | 150         | 7,179,339,600  | 7.3                             | 2,599,161,787  |
| Williams 82       | replicate1 | 2-4mm flower bud | Bisulfite sequencing | 256,382,787     | 150         | 76,914,836,100 | 78.6                            | 69,691,179,252 |
| Williams 82       | replicate2 | 2-4mm flower bud | Bisulfite sequencing | 211,021,959     | 150         | 63,306,587,700 | 64.7                            | 56,504,189,523 |

<sup>a</sup>Sequence depth was calculated based on the size of Williams 82 reference genome (Wm82.a2.v1).

**Table S10** Summary of long non-coding RNAs (lncRNAs) overlapping intergenic recombination sites

| Chr.  | Start    | End      | Strand | LncRNA ID         | LncRNA transcript ID | Source                       |
|-------|----------|----------|--------|-------------------|----------------------|------------------------------|
| Chr01 | 942147   | 994455   | +      | Gmax_MSTRG.222    | Gmax_MSTRG.222.1     | Lin <i>et al.</i> , 2020     |
| Chr01 | 3032528  | 3033873  | .      | NC_GMAXST00000319 | NC_GMAXST00000319.1  | Golicez <i>et al.</i> , 2018 |
| Chr01 | 43900766 | 43900988 | .      | NC_GMAXST00001442 | NC_GMAXST00001442.1  | Golicez <i>et al.</i> , 2018 |
| Chr02 | 7097196  | 7157917  | -      | Gmax_MSTRG.6263   | Gmax_MSTRG.6263.1    | Lin <i>et al.</i> , 2020     |
| Chr02 | 41411598 | 41497734 | +      | Gmax_MSTRG.9167   | Gmax_MSTRG.9167.1    | Lin <i>et al.</i> , 2020     |
| Chr03 | 34483718 | 34484048 | -      | Gmax_MSTRG.12912  | Gmax_MSTRG.12912.1   | Lin <i>et al.</i> , 2020     |
| Chr03 | 41616443 | 41651413 | +      | Gmax_MSTRG.14471  | Gmax_MSTRG.14471.1   | Lin <i>et al.</i> , 2020     |
| Chr04 | 885448   | 1014561  | +      | Gmax_MSTRG.15820  | Gmax_MSTRG.15820.1   | Lin <i>et al.</i> , 2020     |
| Chr04 | 5850910  | 5853410  | -      | Gmax_MSTRG.17023  | Gmax_MSTRG.17023.1   | Lin <i>et al.</i> , 2020     |
| Chr04 | 47024030 | 47024273 | .      | NC_GMAXST00011015 | NC_GMAXST00011015.1  | Golicez <i>et al.</i> , 2018 |
| Chr04 | 49828027 | 49852984 | -      | Gmax_MSTRG.20084  | Gmax_MSTRG.20084.1   | Lin <i>et al.</i> , 2020     |
| Chr04 | 50770063 | 50772962 | -      | Gmax_MSTRG.20314  | Gmax_MSTRG.20314.1   | Lin <i>et al.</i> , 2020     |
| Chr05 | 3311169  | 3367762  | -      | Gmax_MSTRG.21489  | Gmax_MSTRG.21489.1   | Lin <i>et al.</i> , 2020     |
| Chr06 | 694842   | 695283   | -      | Gmax_MSTRG.25700  | Gmax_MSTRG.25700.1   | Lin <i>et al.</i> , 2020     |
| Chr06 | 694874   | 695281   | .      | NC_GMAXST00014431 | NC_GMAXST00014431.1  | Golicez <i>et al.</i> , 2018 |
| Chr06 | 10149689 | 10151316 | +      | Gmax_MSTRG.28045  | Gmax_MSTRG.28045.1   | Lin <i>et al.</i> , 2020     |
| Chr06 | 42499379 | 42881041 | -      | Gmax_MSTRG.30507  | Gmax_MSTRG.30507.1   | Lin <i>et al.</i> , 2020     |
| Chr06 | 49838839 | 49839433 | +      | NC_GMAXST00017627 | NC_GMAXST00017627.1  | Golicez <i>et al.</i> , 2018 |
| Chr07 | 1144935  | 1205598  | -      | Gmax_MSTRG.32113  | Gmax_MSTRG.32113.1   | Lin <i>et al.</i> , 2020     |
| Chr07 | 1145112  | 1206743  | -      | Gmax_MSTRG.32113  | Gmax_MSTRG.32113.7   | Lin <i>et al.</i> , 2020     |
| Chr07 | 1145117  | 1193145  | -      | Gmax_MSTRG.32113  | Gmax_MSTRG.32113.8   | Lin <i>et al.</i> , 2020     |
| Chr07 | 1145750  | 1221355  | -      | Gmax_MSTRG.32113  | Gmax_MSTRG.32113.10  | Lin <i>et al.</i> , 2020     |
| Chr07 | 1145793  | 1239368  | -      | Gmax_MSTRG.32113  | Gmax_MSTRG.32113.11  | Lin <i>et al.</i> , 2020     |
| Chr07 | 3250450  | 3257112  | -      | Gmax_MSTRG.32602  | Gmax_MSTRG.32602.5   | Lin <i>et al.</i> , 2020     |
| Chr07 | 3255079  | 3257105  | +      | Gmax_MSTRG.32610  | Gmax_MSTRG.32610.1   | Lin <i>et al.</i> , 2020     |
| Chr07 | 6547979  | 6620892  | -      | Gmax_MSTRG.33219  | Gmax_MSTRG.33219.1   | Lin <i>et al.</i> , 2020     |
| Chr07 | 10431645 | 10432723 | +      | NC_GMAXPA00046228 | NC_GMAXPA00046228.1  | Golicez <i>et al.</i> , 2018 |
| Chr07 | 15001933 | 15020877 | +      | Gmax_MSTRG.34317  | Gmax_MSTRG.34317.1   | Lin <i>et al.</i> , 2020     |
| Chr07 | 35711715 | 35744038 | +      | Gmax_MSTRG.35449  | Gmax_MSTRG.35449.2   | Lin <i>et al.</i> , 2020     |
| Chr07 | 42426584 | 42427478 | +      | Gmax_MSTRG.36603  | Gmax_MSTRG.36603.1   | Lin <i>et al.</i> , 2020     |
| Chr08 | 47369605 | 47437747 | -      | Gmax_MSTRG.44220  | Gmax_MSTRG.44220.3   | Lin <i>et al.</i> , 2020     |
| Chr08 | 47392691 | 47454291 | -      | Gmax_MSTRG.44220  | Gmax_MSTRG.44220.11  | Lin <i>et al.</i> , 2020     |
| Chr09 | 5344391  | 5345353  | +      | Gmax_MSTRG.45495  | Gmax_MSTRG.45495.2   | Lin <i>et al.</i> , 2020     |
| Chr09 | 44951381 | 44977945 | +      | Gmax_MSTRG.48657  | Gmax_MSTRG.48657.1   | Lin <i>et al.</i> , 2020     |
| Chr10 | 9269326  | 9269886  | .      | NC_GMAXST00028626 | NC_GMAXST00028626.1  | Golicez <i>et al.</i> , 2018 |
| Chr10 | 45626964 | 45696773 | +      | Gmax_MSTRG.54428  | Gmax_MSTRG.54428.3   | Lin <i>et al.</i> , 2020     |
| Chr12 | 6935711  | 6960635  | -      | Gmax_MSTRG.62552  | Gmax_MSTRG.62552.1   | Lin <i>et al.</i> , 2020     |
| Chr12 | 8075526  | 8075884  | .      | NC_GMAXPA00084507 | NC_GMAXPA00084507.1  | Golicez <i>et al.</i> , 2018 |
| Chr12 | 36246700 | 36247415 | +      | Gmax_MSTRG.64671  | Gmax_MSTRG.64671.1   | Lin <i>et al.</i> , 2020     |
| Chr12 | 38511442 | 38549605 | +      | Gmax_MSTRG.65157  | Gmax_MSTRG.65157.3   | Lin <i>et al.</i> , 2020     |
| Chr12 | 38511645 | 38566222 | +      | Gmax_MSTRG.65157  | Gmax_MSTRG.65157.7   | Lin <i>et al.</i> , 2020     |
| Chr13 | 32536741 | 32538511 | +      | Gmax_MSTRG.69682  | Gmax_MSTRG.69682.1   | Lin <i>et al.</i> , 2020     |
| Chr14 | 2235059  | 2682643  | -      | Gmax_MSTRG.73449  | Gmax_MSTRG.73449.1   | Lin <i>et al.</i> , 2020     |
| Chr14 | 2506570  | 2570344  | -      | Gmax_MSTRG.73499  | Gmax_MSTRG.73499.1   | Lin <i>et al.</i> , 2020     |
| Chr14 | 3838479  | 3916937  | -      | Gmax_MSTRG.73740  | Gmax_MSTRG.73740.1   | Lin <i>et al.</i> , 2020     |
| Chr14 | 3839510  | 3879064  | -      | Gmax_MSTRG.73742  | Gmax_MSTRG.73742.1   | Lin <i>et al.</i> , 2020     |
| Chr14 | 6289470  | 6302241  | +      | Gmax_MSTRG.74277  | Gmax_MSTRG.74277.1   | Lin <i>et al.</i> , 2020     |
| Chr15 | 9680485  | 9682383  | -      | Gmax_MSTRG.79564  | Gmax_MSTRG.79564.1   | Lin <i>et al.</i> , 2020     |
| Chr15 | 49154781 | 49183060 | -      | Gmax_MSTRG.82061  | Gmax_MSTRG.82061.1   | Lin <i>et al.</i> , 2020     |
| Chr16 | 698732   | 704975   | -      | Gmax_MSTRG.82577  | Gmax_MSTRG.82577.1   | Lin <i>et al.</i> , 2020     |
| Chr16 | 5389112  | 5391419  | -      | NC_GMAXPA00113021 | NC_GMAXPA00113021.1  | Golicez <i>et al.</i> , 2018 |
| Chr17 | 3540624  | 3541002  | .      | NC_GMAXST00048916 | NC_GMAXST00048916.1  | Golicez <i>et al.</i> , 2018 |
| Chr17 | 41069090 | 41151977 | -      | Gmax_MSTRG.91318  | Gmax_MSTRG.91318.1   | Lin <i>et al.</i> , 2020     |
| Chr18 | 6121687  | 6151337  | -      | Gmax_MSTRG.92737  | Gmax_MSTRG.92737.1   | Lin <i>et al.</i> , 2020     |
| Chr18 | 8556025  | 8830977  | -      | Gmax_MSTRG.93052  | Gmax_MSTRG.93052.1   | Lin <i>et al.</i> , 2020     |
| Chr18 | 8597961  | 8830977  | -      | Gmax_MSTRG.93052  | Gmax_MSTRG.93052.2   | Lin <i>et al.</i> , 2020     |
| Chr18 | 52454256 | 52543468 | +      | Gmax_MSTRG.95620  | Gmax_MSTRG.95620.1   | Lin <i>et al.</i> , 2020     |
| Chr18 | 53083249 | 53153852 | -      | Gmax_MSTRG.95751  | Gmax_MSTRG.95751.1   | Lin <i>et al.</i> , 2020     |
| Chr18 | 55976420 | 55977114 | .      | NC_GMAXST00054137 | NC_GMAXST00054137.1  | Golicez <i>et al.</i> , 2018 |
| Chr18 | 56153467 | 56155241 | +      | NC_GMAXPA00131685 | NC_GMAXPA00131685.1  | Golicez <i>et al.</i> , 2018 |
| Chr18 | 56153467 | 56156205 | +      | NC_GMAXPA00131685 | NC_GMAXPA00131685.2  | Golicez <i>et al.</i> , 2018 |
| Chr19 | 36950619 | 37039372 | +      | Gmax_MSTRG.98896  | Gmax_MSTRG.98896.1   | Lin <i>et al.</i> , 2020     |
| Chr19 | 47666942 | 47744262 | +      | Gmax_MSTRG.101163 | Gmax_MSTRG.101163.1  | Lin <i>et al.</i> , 2020     |
| Chr19 | 48279095 | 48279470 | .      | NC_GMAXST00056954 | NC_GMAXST00056954.1  | Golicez <i>et al.</i> , 2018 |
| Chr20 | 4670821  | 4671895  | .      | NC_GMAXST00057639 | NC_GMAXST00057639.1  | Golicez <i>et al.</i> , 2018 |
| Chr20 | 4670856  | 4671895  | +      | Gmax_MSTRG.102599 | Gmax_MSTRG.102599.2  | Lin <i>et al.</i> , 2020     |
| Chr20 | 4670856  | 4672034  | +      | Gmax_MSTRG.102599 | Gmax_MSTRG.102599.1  | Lin <i>et al.</i> , 2020     |

**Table S10.** Continued

---

|       |          |          |   |                   |                     |                             |
|-------|----------|----------|---|-------------------|---------------------|-----------------------------|
| Chr20 | 4670888  | 4671746  | + | NC_GMAXST00057639 | NC_GMAXST00057639.2 | Golicz <i>et al.</i> , 2018 |
| Chr20 | 46522021 | 46525230 | . | NC_GMAXST00059854 | NC_GMAXST00059854.1 | Golicz <i>et al.</i> , 2018 |
| Chr20 | 46523333 | 46677135 | - | Gmax_MSTRG.106443 | Gmax_MSTRG.106443.1 | Lin <i>et al.</i> , 2020    |

---
